# Supplementary material for: Interfacial interaction driven CO oxidation: nanostructured Ce1−xLaxO2−δ/TiO2 solid solutions
Source: Royal Society of Chemistry journal article supplement (doi:10.1039/c2cy00449f), 2011-12-09
Supplement: c2cy00449f.pdf [file c2cy00449f.pdf]

**Electronic Supporting Information**

**Interfacial Interaction Driven CO Oxidation: Novel  
Nanosized  $\text{Ce}_{1-x}\text{La}_x\text{O}_{2-\delta}/\text{TiO}_2$  Solid Solutions**

**Lakshmi Katta and Benjaram M. Reddy\***

*Inorganic and Physical Chemistry Division, Indian Institute of Chemical Technology,  
Uppal Road, Hyderabad – 500 607, India*

**Martin Muhler and Wolfgang Grünert**

*Laboratory of Industrial Chemistry, Ruhr-University Bochum, D-44780 Bochum,  
Germany*

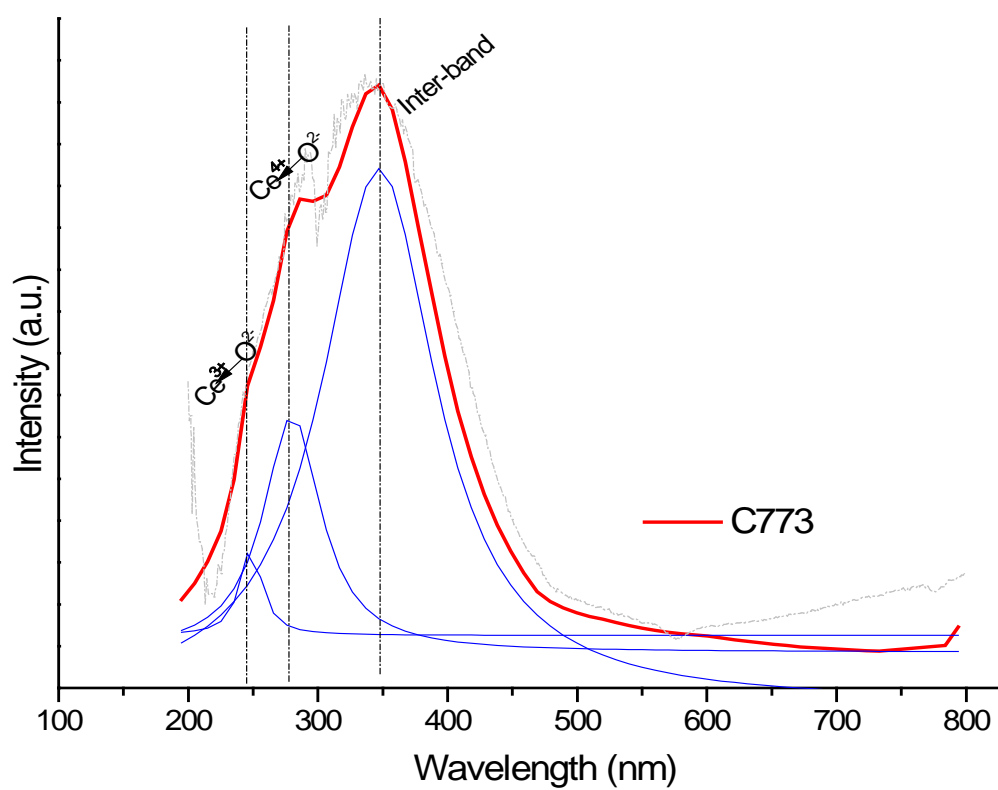

**Fig. S1** The deconvoluted UV-vis DR spectrum of pure ceria calcined at 773 K.

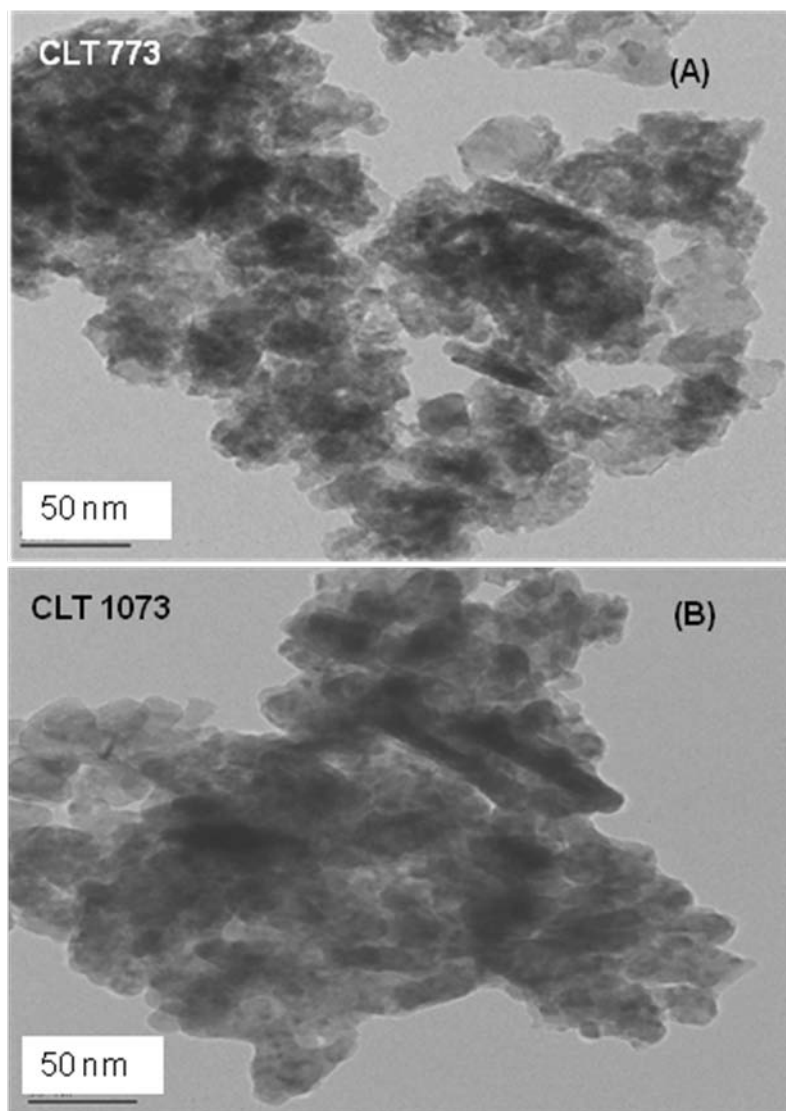

**Fig. S2** (A) TEM image of titania supported ceria–lanthana (CLT) solid solutions calcined at 773 K and (B) TEM image of titania supported ceria–lanthana (CLT) solid solutions calcined at 1073 K.

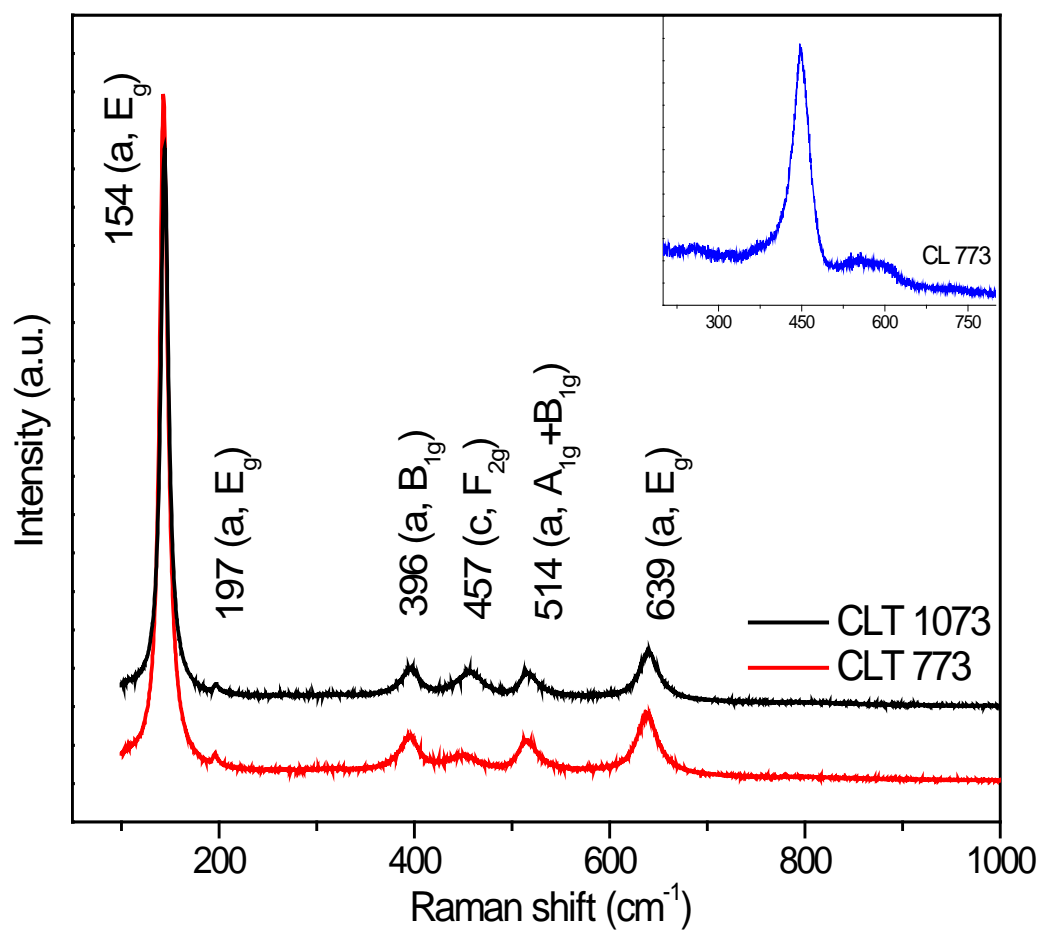

**Fig. S3** Vis-RS of titania supported ceria-lanthana (CLT) solid solutions calcined at 773 and 1073 K (inset: CL 773), a-anatase; c-ceria.
